# Supplementary material for: A Novel Electrokinetic-Based Technique for the Isolation of Circulating Tumor Cells
Source: MDPI journal article supplement (doi:10.3390/mi14112062), 2023-11-05
Supplement: s1 [file s1]

# A Novel Electrokinetic-Based Technique for the Isolation of Circulating Tumor Cells

Mohammad K. D. Manshadi <sup>1,\*</sup>, Mahsa Saadat <sup>2</sup>, Mehdi Mohammadi <sup>3,4</sup> and Amir Sanati Nezhad <sup>4,5</sup>

<sup>1</sup> Mechanical Engineering Department, Southern Methodist University, Dallas, TX 75206, USA

<sup>2</sup> Department of Biomedical Engineering, Florida International University, Miami, FL 33199, USA; msaad021@fiu.edu

<sup>3</sup> Department of Biological Sciences, University of Calgary, Calgary, AB T2N 1N4, Canada; mehdi.mohammadiashan@ucalgary.ca

<sup>4</sup> Department of Biomedical Engineering, Schulich School of Engineering, University of Calgary, Calgary, AB T2N 1N4, Canada; amir.sanatinnezhad@ucalgary.ca

<sup>5</sup> BioMEMS and Bioinspired Microfluidic Laboratory, Department of Biomedical Engineering, Schulich School of Engineering, University of Calgary, Calgary, AB T2N 1N4, Canada

\* Correspondence: mdehghanmanshadi@smu.edu

**Table S1.** Raw data corresponding to Figure 3B, Figure 3C, and Figure 3D.

| Fig. 3B  |          | Fig. 3C  |          | Fig. 3D  |          |
|----------|----------|----------|----------|----------|----------|
| x(μm)    | y(μm)    | x(μm)    | y(μm)    | x(μm)    | y(μm)    |
| -300     | 75       | -300     | 75       | -300     | 75       |
| -300     | 225      | -300     | 225      | -300     | 225      |
| -288.569 | 225.0072 | -283.719 | 225.0212 | -276.981 | 225.0525 |
| -288.569 | 74.9928  | -283.719 | 74.9788  | -276.981 | 74.9475  |
| -277.141 | 225.0274 | -267.447 | 225.068  | -253.984 | 225.152  |
| -277.141 | 74.9726  | -267.447 | 74.932   | -253.984 | 74.848   |
| -265.716 | 225.0539 | -251.179 | 225.1226 | -230.995 | 225.261  |
| -265.716 | 74.9461  | -251.179 | 74.8774  | -230.995 | 74.739   |
| -254.293 | 225.0822 | -234.916 | 225.179  | -208.004 | 225.3613 |
| -254.293 | 74.9178  | -234.916 | 74.821   | -208.004 | 74.6387  |
| -242.87  | 225.1109 | -218.652 | 74.7644  | -185.013 | 74.5395  |
| -242.87  | 74.8891  | -218.652 | 225.2356 | -185.013 | 225.4605 |
| -231.449 | 225.1399 | -202.389 | 74.7078  | -162.022 | 74.4402  |
| -231.449 | 74.8601  | -202.389 | 225.2922 | -162.022 | 225.5598 |
| -220.027 | 74.8311  | -186.145 | 74.7133  | -139.09  | 74.5137  |
| -220.027 | 225.1689 | -186.145 | 225.2867 | -139.09  | 225.4863 |
| -208.605 | 74.8021  | -169.91  | 225.2546 | -116.185 | 225.3389 |
| -208.605 | 225.1979 | -169.91  | 74.7454  | -116.185 | 74.6611  |
| -197.184 | 74.7731  | -153.675 | 225.2226 | -93.5136 | 75.4465  |
| -197.184 | 225.2269 | -153.675 | 74.7774  | -93.5136 | 224.5535 |
| -185.775 | 74.7796  | -137.44  | 225.1905 | -71.2021 | 77.3751  |
| -185.775 | 225.2204 | -137.44  | 74.8095  | -71.2021 | 222.6249 |
| -174.376 | 225.185  | -121.204 | 225.1584 | -49.3505 | 81.2414  |
| -174.376 | 74.815   | -121.204 | 74.8416  | -49.3505 | 218.7586 |
| -162.977 | 225.1496 | -104.969 | 225.1264 | -27.6626 | 89.4261  |
| -162.977 | 74.8504  | -104.969 | 74.8736  | -27.6626 | 210.5739 |
| -151.578 | 225.1141 | -88.7996 | 224.9196 | -2.6779  | 104.9979 |
| -151.578 | 74.8859  | -88.7996 | 75.0804  | -2.6779  | 195.0021 |
| -140.18  | 225.0787 | -72.9105 | 223.9395 | 45.7783  | 131.1788 |

|          |          |          |          |          |          |
|----------|----------|----------|----------|----------|----------|
| -140.18  | 74.9213  | -72.9105 | 76.0605  | 45.7783  | 168.8212 |
| -128.781 | 225.0433 | -57.2448 | 77.7822  | 281.8573 | 277.0764 |
| -128.781 | 74.9567  | -57.2448 | 222.2178 | 281.9247 | 22.9377  |
| -117.382 | 225.0078 | -41.8372 | 80.6969  | 67.5227  | 256.311  |
| -117.382 | 74.9922  | -41.8372 | 219.3031 | 67.6743  | 43.3926  |
| -105.984 | 224.9724 | -26.5556 | 85.4293  | 88.6637  | 124.0771 |
| -105.984 | 75.0276  | -26.5556 | 214.5707 | 89.9537  | 175.3731 |
| -94.5849 | 224.937  | -10.764  | 92.9142  | 116.8298 | 276.4132 |
| -94.5849 | 75.063   | -10.764  | 207.0858 | 119.37   | 22.46    |
| -83.1862 | 224.9015 | 7.5343   | 104.2372 | 95.4993  | 121.1265 |
| -83.1862 | 75.0985  | 7.5343   | 195.7628 | 100.368  | 176.7425 |
| -71.9651 | 224.392  | 34.6425  | 120.4676 | 91.4389  | 254.3672 |
| -71.9651 | 75.608   | 34.6425  | 179.5324 | 95.7635  | 40.9285  |
| -60.8395 | 223.598  | 100.1628 | 140.1668 | 215.7634 | 46.7019  |
| -60.8395 | 76.402   | 100.1628 | 159.8332 | 263.2583 | 263.0353 |
| -49.82   | 222.4412 | 280.607  | 261.8603 | 98.2115  | 111.0051 |
| -49.82   | 77.5588  | 280.6311 | 38.1524  | 114.0417 | 180.1055 |
| -38.9187 | 79.2197  | 254.8287 | 295.8971 | 88.2627  | 216.6477 |
| -38.9187 | 220.7803 | 255.5522 | 4.1101   | 88.7192  | 68.8682  |
| -28.1172 | 81.555   | 232.7631 | 298.9205 | 99.8911  | 243.8031 |
| -28.1172 | 218.445  | 234.9765 | 1.0914   | 117.2884 | 38.6401  |
| -17.3411 | 84.7882  | 261.4417 | 299.67   | 117.6609 | 258.3557 |
| -17.3411 | 215.2118 | 264.4198 | 0.3408   | 158.3031 | 21.5869  |
| -6.3928  | 89.1911  | 307.3954 | 299.8469 | 124.0372 | 260.8102 |
| -6.3928  | 210.8089 | 310.6746 | 0.1575   | 180.8421 | 17.3155  |
| 5.1501   | 95.0783  | 357.201  | 299.9077 | 116.4369 | 252.4284 |
| 5.1501   | 204.9217 | 360.681  | 0.0936   | 163.4246 | 22.0185  |
| 18.1981  | 102.8238 | 405.9934 | 299.9183 | 106.389  | 234.3477 |
| 18.1981  | 197.1762 | 409.1568 | 0.0863   | 131.196  | 37.2393  |
| 34.6515  | 112.7173 | 445.09   | 299.7796 | 108.9134 | 208.8279 |
| 34.6515  | 187.2827 | 447.6738 | 0.2521   | 109.5114 | 61.9546  |
| 58.9265  | 124.7229 | 477.0209 | 299.3761 | 111.3798 | 93.0278  |
| 58.9265  | 175.2771 | 479.5074 | 0.6884   | 143.3872 | 185.6879 |
| 104.3753 | 137.3151 | 504.6672 | 298.9122 | 156.4086 | 114.7466 |
| 104.3753 | 162.6849 | 507.0345 | 1.1643   | 224.8987 | 258.0332 |
| 187.6708 | 134.2045 | 528.578  | 298.5422 | 142.1059 | 264.697  |
| 187.6708 | 165.7955 | 530.7973 | 1.5353   | 239.1319 | 27.5852  |
| 288.038  | 269.5889 | 549.7672 | 298.2793 | 116.6674 | 209.0743 |
| 288.0542 | 30.4184  | 551.8646 | 1.7964   | 120.4285 | 55.3598  |
| 327.738  | 291.903  | 569.1089 | 298.1012 | 138.4974 | 108.0261 |
| 327.8563 | 8.0981   | 571.1187 | 1.9725   | 190.3846 | 215.7262 |
| 446.1504 | 292.9198 | 587.2578 | 297.9828 | 127.7414 | 249.3406 |
| 446.399  | 7.1106   | 589.2035 | 2.0891   | 216.9524 | 20.8679  |
| 513.3922 | 284.1382 | 604.6268 | 297.9061 | 120.4267 | 87.1044  |
| 513.5322 | 15.9068  | 606.5294 | 2.1644   | 158.3032 | 191.4242 |
| 548.7057 | 277.2815 | 621.5194 | 297.8562 | 137.2294 | 255.2011 |
| 548.8133 | 22.7738  | 623.3918 | 2.2133   | 232.3934 | 29.85    |
| 573.2871 | 272.0158 | 638.0965 | 297.825  | 129.2084 | 93.6579  |
| 573.3785 | 28.047   | 639.9493 | 2.2438   | 177.2836 | 201.7168 |
| 592.6587 | 268.0238 | 654.4927 | 297.805  | 125.4177 | 220.8413 |
| 592.7403 | 32.0446  | 656.3329 | 2.2634   | 156.077  | 34.3199  |

|          |          |          |          |          |          |
|----------|----------|----------|----------|----------|----------|
| 609.1029 | 265.0459 | 670.7639 | 297.793  | 162.6716 | 267.7278 |
| 609.1783 | 35.0267  | 672.5955 | 2.2751   | 189.0855 | 78.0977  |
| 623.7952 | 262.8485 | 686.9662 | 297.7856 | 147.8902 | 98.7836  |
| 623.8664 | 37.2272  | 688.7923 | 2.2822   | 217.3012 | 260.3494 |
| 637.3567 | 261.2519 | 703.12   | 297.7817 | 133.6275 | 83.4176  |
| 637.4252 | 38.8258  | 704.9429 | 2.286    | 175.446  | 207.0194 |
| 650.1801 | 260.1088 | 719.2556 | 297.7791 | 133.4736 | 72.3746  |
| 650.2467 | 39.9703  | 721.0762 | 2.2885   | 163.8056 | 203.4868 |
| 662.5074 | 259.3022 | 735.3764 | 297.7776 | 135.4149 | 70.2283  |
| 662.5727 | 40.7778  | 737.1956 | 2.2899   | 165.3476 | 205.4147 |
| 674.4985 | 258.7444 | 751.4892 | 297.7769 | 137.5853 | 76.5568  |
| 674.563  | 41.3363  | 753.3076 | 2.2907   | 177.4689 | 213.2818 |
| 686.2663 | 258.364  | 767.5966 | 297.7766 | 146.1027 | 87.4205  |
| 686.3305 | 41.7171  | 769.4147 | 2.2909   | 208.9389 | 259.0496 |
| 697.8841 | 258.1107 | 783.7041 | 297.7763 | 168.3315 | 90.2796  |
| 697.9481 | 41.9707  | 785.5219 | 2.2912   | 180.6849 | 269.6038 |
| 709.4038 | 257.9454 | 799.8096 | 297.7762 | 143.3905 | 240.0411 |
| 709.4677 | 42.1361  | 801.6274 | 2.2913   | 213.0198 | 37.8766  |
| 720.8559 | 257.845  | 815.9149 | 297.7762 | 149.688  | 213.8313 |
| 720.9198 | 42.2367  | 817.7326 | 2.2913   | 162.3656 | 39.4235  |
| 732.2691 | 257.7849 | 832.02   | 297.7762 | 142.088  | 73.4026  |
| 732.3331 | 42.2968  | 833.8378 | 2.2913   | 185.3527 | 226.4994 |
| 743.6558 | 257.7552 | 848.1251 | 297.7762 | 165.8494 | 88.9922  |
| 743.7198 | 42.3265  | 849.943  | 2.2913   | 179.1323 | 268.3224 |
| 755.0317 | 257.7399 | 864.2301 | 297.7762 | 142.4851 | 231.1947 |
| 755.0958 | 42.3418  | 866.0482 | 2.2913   | 213.4709 | 31.3905  |
| 766.4003 | 257.7364 | 880.3352 | 297.7762 | 149.0015 | 52.3843  |
| 766.4646 | 42.3452  | 882.1534 | 2.2913   | 163.6498 | 211.0757 |
| 777.7667 | 257.7395 | 896.4402 | 297.7761 | 149.423  | 84.7243  |
| 777.8311 | 42.3422  | 898.2585 | 2.2914   | 213.5135 | 268.2208 |
| 789.1335 | 257.746  | 912.5452 | 297.7761 | 148.4565 | 246.5588 |
| 789.198  | 42.3357  | 914.3637 | 2.2914   | 188.2732 | 68.1395  |
| 800.5022 | 257.7539 | 928.6501 | 297.7761 | 150.973  | 214.3599 |
| 800.5668 | 42.3277  | 930.4689 | 2.2914   | 169.9268 | 35.68    |
| 811.8735 | 257.7621 | 944.7551 | 297.7761 | 143.0755 | 73.9435  |
| 811.9383 | 42.3195  | 946.574  | 2.2914   | 192.3818 | 239.9133 |
| 823.2478 | 257.7698 | 960.8601 | 297.7761 | 163.9428 | 260.8623 |
| 823.3126 | 42.3118  | 962.6792 | 2.2914   | 170.9411 | 86.8135  |
| 834.6247 | 257.7767 | 976.9649 | 297.7761 | 144.1208 | 222.8654 |
| 834.6897 | 42.3049  | 978.7842 | 2.2914   | 201.8833 | 28.1372  |
| 846.0043 | 257.7825 | 993.0697 | 297.7761 | 144.4128 | 60.9995  |
| 846.0693 | 42.299   | 994.8892 | 2.2914   | 175.8277 | 216.2444 |
| 857.3861 | 257.7874 | 1009.175 | 297.7761 | 156.9899 | 88.2722  |
| 857.4512 | 42.2941  | 1010.994 | 2.2914   | 190.999  | 271.0998 |
| 868.7698 | 257.7914 | 1025.279 | 297.7761 | 143.1192 | 234.1684 |
| 868.835  | 42.2901  | 1027.099 | 2.2914   | 210.2129 | 39.0063  |
| 880.1549 | 257.7946 | 1041.384 | 297.7761 | 153.9798 | 47.0034  |
| 880.2203 | 42.2869  | 1043.204 | 2.2914   | 161.9368 | 211.1713 |
| 891.5418 | 257.7968 | 1057.489 | 297.7761 | 147.3331 | 82.4081  |
| 891.6072 | 42.2847  | 1059.309 | 2.2914   | 214.0955 | 267.0775 |
| 902.9289 | 257.7989 | 1073.594 | 297.7761 | 149.1565 | 247.474  |

|          |          |          |          |          |          |
|----------|----------|----------|----------|----------|----------|
| 902.9944 | 42.2826  | 1075.414 | 2.2914   | 184.57   | 74.1162  |
| 914.3172 | 257.8004 | 1089.698 | 297.7761 | 150.6254 | 214.6822 |
| 914.3828 | 42.2811  | 1091.519 | 2.2914   | 174.6781 | 33.5466  |
| 925.7059 | 257.8015 | 1105.803 | 297.7761 | 142.8751 | 72.27    |
| 925.7716 | 42.28    | 1107.624 | 2.2914   | 191.8404 | 238.8303 |
| 937.0953 | 257.8023 | 1121.908 | 297.7761 | 164.3681 | 261.1145 |
| 937.1611 | 42.2793  | 1123.729 | 2.2914   | 169.1646 | 87.5135  |
| 948.4851 | 257.8027 | 1138.013 | 297.7761 | 144.1244 | 222.9494 |
| 948.551  | 42.2788  | 1139.834 | 2.2914   | 204.8583 | 28.3965  |
| 959.875  | 257.8032 | 1154.117 | 297.7761 | 144.9649 | 59.7187  |
| 959.9409 | 42.2783  | 1155.939 | 2.2914   | 175.9691 | 216.3991 |
| 971.2648 | 257.8036 | 1170.222 | 297.7761 | 156.0486 | 87.9839  |
| 971.3308 | 42.2779  | 1172.044 | 2.2914   | 190.5364 | 271.0174 |
| 982.6548 | 257.8039 | 1186.327 | 297.7761 | 143.0962 | 233.9147 |
| 982.721  | 42.2776  | 1188.149 | 2.2914   | 207.7007 | 40.4966  |
| 994.0452 | 257.804  | 1202.432 | 297.7761 | 155.239  | 45.7972  |
| 994.1114 | 42.2775  | 1204.254 | 2.2914   | 162.3345 | 211.2035 |
| 1005.436 | 257.8041 | 1218.536 | 297.7761 | 146.7407 | 81.679   |
| 1005.502 | 42.2774  | 1220.359 | 2.2914   | 213.7602 | 267.677  |
| 1016.826 | 257.8041 | 1234.641 | 297.7761 | 148.5004 | 246.5037 |
| 1016.892 | 42.2774  | 1236.464 | 2.2914   | 183.2518 | 75.9699  |
| 1028.216 | 257.8042 | 1250.746 | 297.7761 | 151.4334 | 214.1602 |
| 1028.283 | 42.2773  | 1252.568 | 2.2914   | 176.9105 | 32.6509  |
| 1039.607 | 257.8042 | 1266.851 | 297.7761 | 142.7612 | 71.2793  |
| 1039.673 | 42.2773  | 1268.673 | 2.2914   | 193.6189 | 242.4369 |
| 1050.997 | 257.8042 | 1282.955 | 297.7761 | 162.5062 | 259.9172 |
| 1051.064 | 42.2773  | 1284.778 | 2.2914   | 167.783  | 87.9953  |
| 1062.388 | 257.8042 | 1299.06  | 297.7761 | 144.4279 | 222.1231 |
| 1062.455 | 42.2773  | 1300.883 | 2.2914   | 207.7633 | 28.8996  |
| 1073.778 | 257.8042 | 1315.165 | 297.7761 | 145.7375 | 58.0039  |
| 1073.845 | 42.2773  | 1316.988 | 2.2914   | 176.9178 | 217.1271 |
| 1085.169 | 257.8042 | 1331.27  | 297.7761 | 154.4551 | 87.4408  |
| 1085.236 | 42.2773  | 1333.093 | 2.2914   | 189.0613 | 270.7672 |
| 1096.559 | 257.8042 | 1347.374 | 297.7761 | 142.9879 | 233.5875 |
| 1096.626 | 42.2773  | 1349.198 | 2.2914   | 201.7922 | 43.8726  |
| 1107.95  | 257.8042 | 1363.479 | 297.7761 | 157.5537 | 43.7699  |
| 1108.017 | 42.2773  | 1365.303 | 2.2914   | 162.3848 | 211.1552 |
| 1119.34  | 257.8042 | 1379.584 | 297.7761 | 145.7985 | 80.3989  |
| 1119.407 | 42.2773  | 1381.408 | 2.2914   | 213.9027 | 267.5103 |
| 1130.731 | 257.8042 | 1395.689 | 297.7761 | 148.7749 | 246.9524 |
| 1130.798 | 42.2773  | 1397.513 | 2.2914   | 180.94   | 78.8698  |
| 1142.121 | 257.8042 | 1411.793 | 297.7761 | 150.891  | 214.4572 |
| 1142.189 | 42.2773  | 1413.618 | 2.2914   | 181.024  | 31.2443  |
| 1153.512 | 257.8042 | 1427.898 | 297.7761 | 142.7482 | 69.6978  |
| 1153.579 | 42.2773  | 1429.723 | 2.2914   | 192.3067 | 239.7716 |
| 1164.902 | 257.8042 | 1444.003 | 297.7761 | 163.968  | 260.8835 |
| 1164.97  | 42.2773  | 1445.828 | 2.2914   | 166.1536 | 88.3753  |
| 1176.293 | 257.8042 | 1460.107 | 297.7761 | 144.066  | 222.9207 |
| 1176.36  | 42.2773  | 1461.933 | 2.2914   | 209.9328 | 29.5973  |
| 1187.683 | 257.8041 | 1476.212 | 297.7761 | 146.3503 | 56.9087  |
| 1187.751 | 42.2774  | 1478.037 | 2.2914   | 175.5155 | 215.9743 |

|          |          |          |          |          |          |
|----------|----------|----------|----------|----------|----------|
| 1199.074 | 257.8041 | 1492.317 | 297.7761 | 153.7557 | 87.1257  |
| 1199.141 | 42.2774  | 1494.142 | 2.2914   | 192.0931 | 271.275  |
| 1210.464 | 257.8041 |          |          | 143.2034 | 234.7375 |
| 1210.532 | 42.2774  |          |          | 199.5033 | 46.1198  |
| 1221.855 | 257.8041 |          |          | 158.3985 | 43.0894  |
| 1221.923 | 42.2774  |          |          | 161.133  | 211.1494 |
| 1233.245 | 257.8041 |          |          | 145.5118 | 79.9439  |
| 1233.313 | 42.2774  |          |          | 214.2924 | 266.1781 |
| 1244.636 | 257.8041 |          |          | 149.928  | 248.5011 |
| 1244.704 | 42.2774  |          |          | 180.1487 | 79.755   |
| 1256.026 | 257.8041 |          |          | 149.8258 | 215.2162 |
| 1256.094 | 42.2774  |          |          | 182.4581 | 30.8071  |
| 1267.417 | 257.8041 |          |          | 142.7247 | 69.0221  |
| 1267.485 | 42.2774  |          |          | 189.9438 | 235.0471 |
| 1278.807 | 257.8041 |          |          | 165.1496 | 88.5917  |
| 1278.875 | 42.2774  |          |          | 166.5451 | 262.4333 |
| 1290.197 | 257.8041 |          |          | 143.6567 | 224.0796 |
| 1290.266 | 42.2774  |          |          | 211.4891 | 30.2937  |
| 1301.588 | 257.8041 |          |          | 147.0315 | 55.6844  |
| 1301.657 | 42.2774  |          |          | 173.8851 | 214.8338 |
| 1312.978 | 257.8041 |          |          |          |          |
| 1313.047 | 42.2774  |          |          |          |          |
| 1324.369 | 257.8041 |          |          |          |          |
| 1324.438 | 42.2774  |          |          |          |          |
| 1335.759 | 257.8041 |          |          |          |          |
| 1335.828 | 42.2774  |          |          |          |          |
| 1347.15  | 257.8041 |          |          |          |          |
| 1347.219 | 42.2774  |          |          |          |          |
| 1358.54  | 257.8041 |          |          |          |          |
| 1358.609 | 42.2774  |          |          |          |          |
| 1369.931 | 257.8041 |          |          |          |          |
| 1370     | 42.2774  |          |          |          |          |
| 1381.321 | 257.8041 |          |          |          |          |
| 1381.39  | 42.2774  |          |          |          |          |
| 1392.712 | 257.8041 |          |          |          |          |
| 1392.781 | 42.2774  |          |          |          |          |
| 1404.102 | 257.8041 |          |          |          |          |
| 1404.172 | 42.2774  |          |          |          |          |
| 1415.493 | 257.8041 |          |          |          |          |
| 1415.562 | 42.2774  |          |          |          |          |
| 1426.883 | 257.8042 |          |          |          |          |
| 1426.953 | 42.2773  |          |          |          |          |
| 1438.274 | 257.8042 |          |          |          |          |
| 1438.343 | 42.2773  |          |          |          |          |
| 1449.664 | 257.8042 |          |          |          |          |
| 1449.734 | 42.2773  |          |          |          |          |
| 1461.054 | 257.8042 |          |          |          |          |
| 1461.124 | 42.2773  |          |          |          |          |
| 1472.445 | 257.8043 |          |          |          |          |
| 1472.515 | 42.2772  |          |          |          |          |
| 1483.835 | 257.8043 |          |          |          |          |

|          |          |
|----------|----------|
| 1483.905 | 42.2772  |
| 1495.226 | 257.8043 |
| 1495.296 | 42.2772  |

**Table S2.** Raw data corresponding to Figure 4A.

| <b>Electric field<br/>(V/cm)</b> | <b>dp=5</b> | <b>dp=10</b> | <b>dp=15</b> |
|----------------------------------|-------------|--------------|--------------|
| 35                               | 0           | 0            | 0            |
| 45                               | 0           | 0            | 11           |
| 55                               | 0           | 2            | 20           |
| 65                               | 0           | 12           | 59           |
| 75                               | 0           | 65           | 96           |
| 80                               | 6           | 85           | 100          |
| 85                               | 35          | 93           | 100          |
| 90                               | 91          | 100          | 100          |
| 95                               | 100         | 100          | 100          |

**Table S3.** Raw data corresponding to Figure 4B.

| <b>Particle Diameter</b> | <b>Trapped 85</b> | <b>75</b> | <b>65</b> |
|--------------------------|-------------------|-----------|-----------|
| 1                        | 0                 | 0         | 0         |
| 2                        | 0                 | 0         | 0         |
| 3                        | 0                 | 0         | 0         |
| 4                        | 3                 | 1         | 0         |
| 5                        | 29                | 3         | 0         |
| 6                        | 72                | 5         | 0         |
| 7                        | 90                | 16        | 2         |
| 8                        | 92                | 26        | 4         |
| 10                       | 94                | 47        | 10        |
| 12                       | 97                | 76        | 24        |
| 14                       | 99                | 91        | 44        |
| 15                       | 100               | 94        | 57        |
| 17                       | 100               | 97        | 81        |
| 20                       | 100               | 100       | 94        |
| 25                       | 100               | 100       | 100       |

**Table S4.** Raw data corresponding to Figure 5E.

| <b>zeta</b> | <b>trap</b> |
|-------------|-------------|
| 10          | 100         |
| 30          | 100         |
| 50          | 90          |
| 70          | 30          |
| 100         | 8           |
